# Supplementary material for: A polymeric α-tetrasubstituted Co II -phthalocyanine catalyst for stable and selective electrochemical carbon dioxide reduction
Source: Royal Society of Chemistry journal article supplement (doi:10.1039/d5cp04205d), 2026-01-01
Supplement: d5cp04205d1.pdf [file d5cp04205d1.pdf]

## Supporting Information

### Polymeric $\alpha$ -Tetrasubstituted Co<sup>II</sup>-phthalocyanine Catalyst for Stable and Selective Electrochemical Carbon Dioxide Reduction

Kornkamol Mangmoon,<sup>[a]</sup> Permsak Chairat,<sup>[a]</sup> Yijiao Jiang,<sup>[b]</sup> Poobodin Mano,<sup>[c]</sup> Supawadee Namuangruk,<sup>[c]</sup> and Patchanita Thamyongkit\*<sup>[a]</sup>

---

[a] K. Mangmoon, P. Chairat, Prof. P. Thamyongkit  
Department of Chemistry, Faculty of Science, Chulalongkorn University, Bangkok 10330, Thailand  
E-mail: patchanita.v@chula.ac.th

[b] Y. Jiang  
School of Engineering, Macquarie University, NSW, 2109, Sydney, Australia

[c] S. Namuangruk  
National Nanotechnology Center (NANOTEC)  
National Science and Technology Development Agency (NSTDA)  
Pathum Thani, 12120, Thailand

\* Corresponding author E-mail address: patchanita.v@chula.ac.th

#### Table of Contents

|                                                                                                                                                                       |               |
|-----------------------------------------------------------------------------------------------------------------------------------------------------------------------|---------------|
| Characterization of <b>1</b>                                                                                                                                          | <b>S1</b>     |
| Characterization of <b>CoPc-2a</b>                                                                                                                                    | <b>S2</b>     |
| Characterization of <b>CoPc-1a</b>                                                                                                                                    | <b>S2</b>     |
| Absorption and calibration data of <b>CoPc-1a</b>                                                                                                                     | <b>S3-S4</b>  |
| SEM-EDS image of <b>p(CoPc-1a)/CP</b>                                                                                                                                 | <b>S4</b>     |
| Cyclic voltammograms of a <b>CoPc-1a</b> solution in DMF                                                                                                              | <b>S5</b>     |
| An H-type electrochemical setup                                                                                                                                       | <b>S5</b>     |
| Chronoamperometric responses with % FE <sub>CO</sub> and accumulated amount of CO for the <b>p(CoPc-1a)</b> -catalyzed CO <sub>2</sub> RR in the H-cell               | <b>S6</b>     |
| Nyquist plots of faradaic impedance for the <b>p(CoPc-1a)</b> films                                                                                                   | <b>S7</b>     |
| Cyclic voltammograms of <b>p(CoPc-1a)/MPL-CFP</b>                                                                                                                     | <b>S7</b>     |
| SEM image and EDS mapping of <b>p(CoPc-1a)/MPL-CFP</b> before and after electrolysis                                                                                  | <b>S8</b>     |
| Theoretical calculation data                                                                                                                                          | <b>S8-S12</b> |
| <b>Table S1.</b> Assignment of ATR-FTIR spectra of <b>CoPc-2a</b> , <b>CoPc-1a</b> and <b>p(CoPc-1a)/Au-glass</b>                                                     | <b>S13</b>    |
| <b>Table S2.</b> Assignment of Raman spectra of <b>CoPc-1a/CP</b> and <b>p(CoPc-1a)/CP</b> .                                                                          | <b>S13</b>    |
| <b>Table S3.</b> Co <sup>II</sup> content on substrates determined by ICP-OES                                                                                         | <b>S14</b>    |
| <b>Table S4.</b> Comparison of catalytic performance of <b>p-CoPc-1a /CFP</b> with selected reported CoPc-based catalysts for ECO <sub>2</sub> R in the aqueous media | <b>S15</b>    |

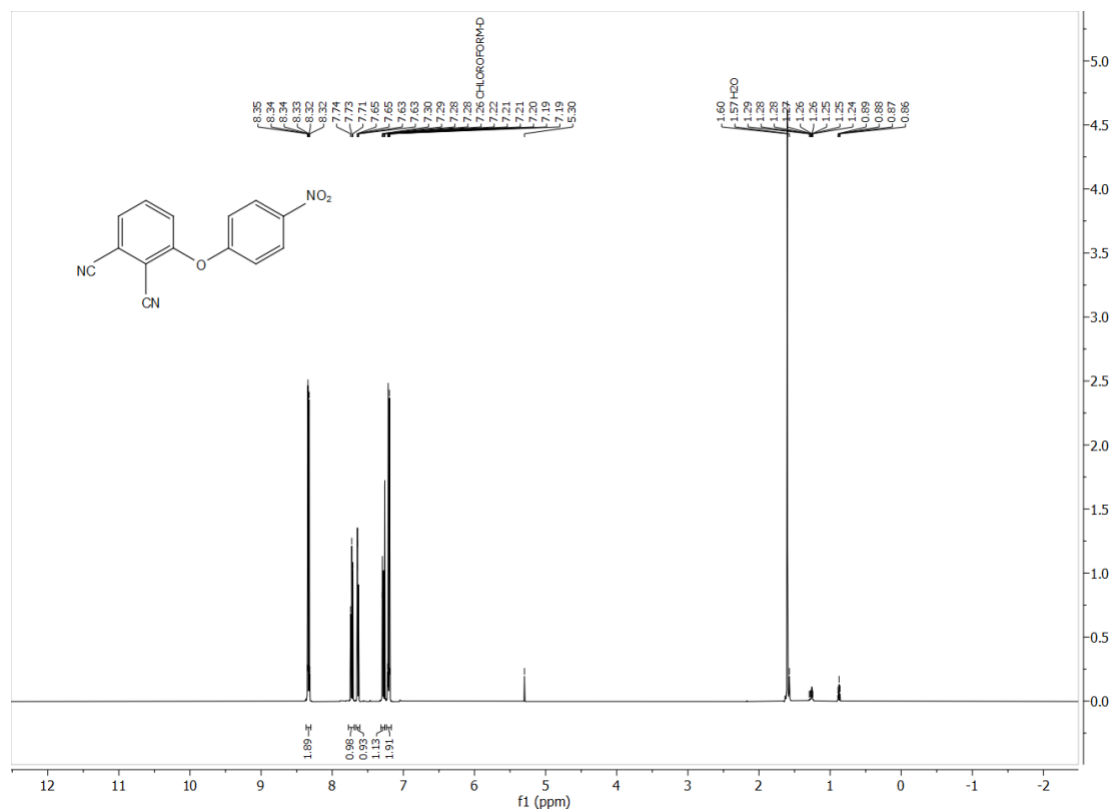

Fig. S1. A <sup>1</sup>H NMR spectrum of compound 1 in CDCl<sub>3</sub>

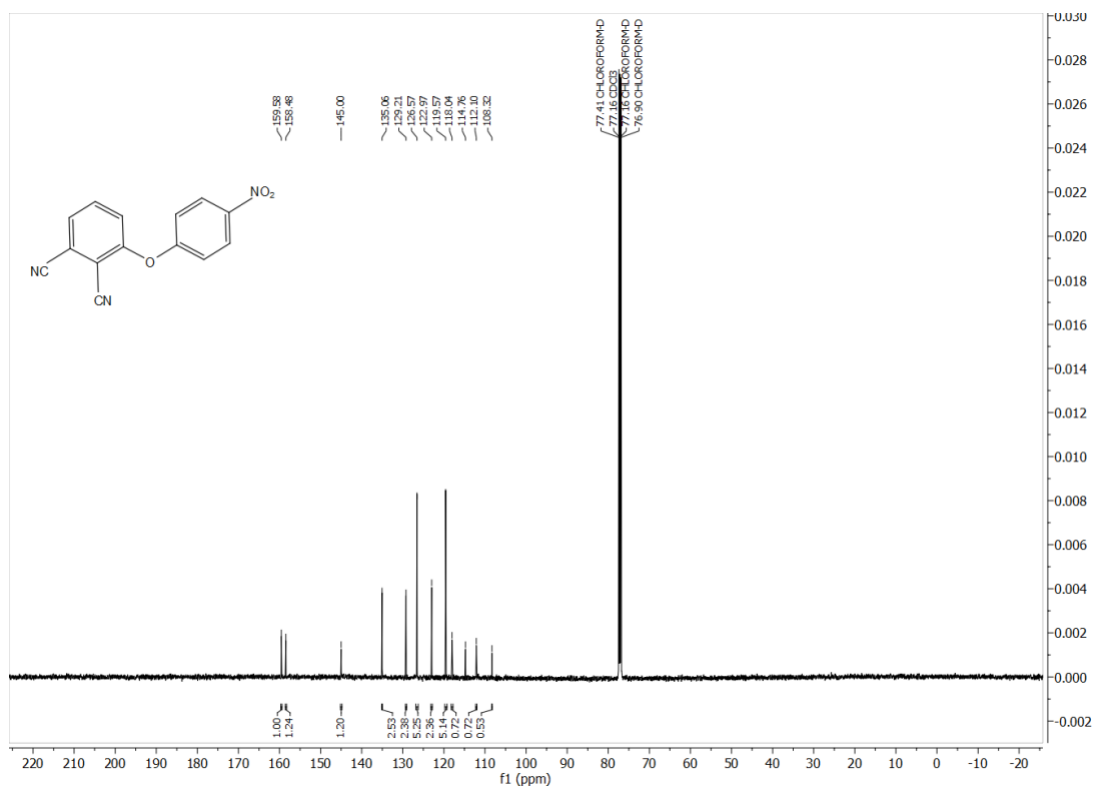

Fig. S2. A <sup>13</sup>C NMR spectrum of compound 1 in CDCl<sub>3</sub>

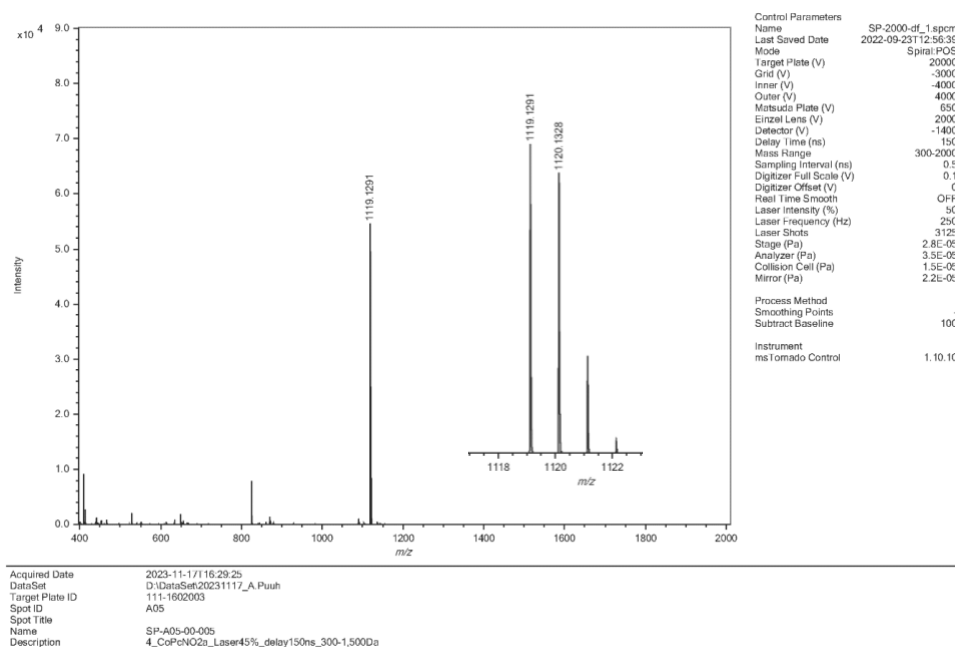

**Fig. S3.** An HR-MALDI-TOF mass spectrum and an isotopic pattern of a molecular ion peak of **CoPc-2a**

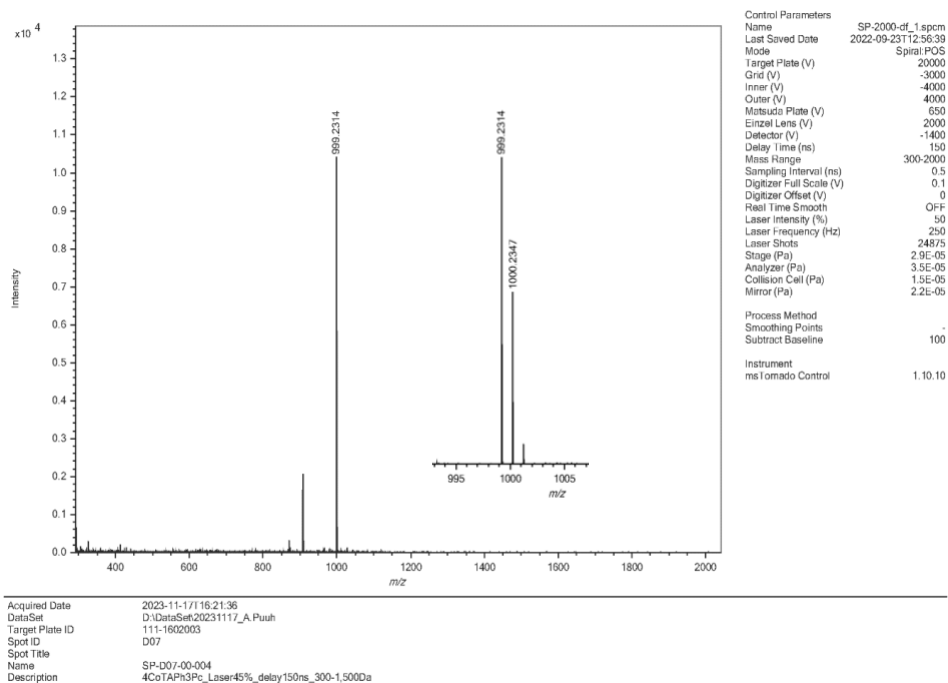

**Fig. S4.** An HR-MALDI-TOF mass spectrum and an isotopic pattern of a molecular ion peak of **CoPc-1a**

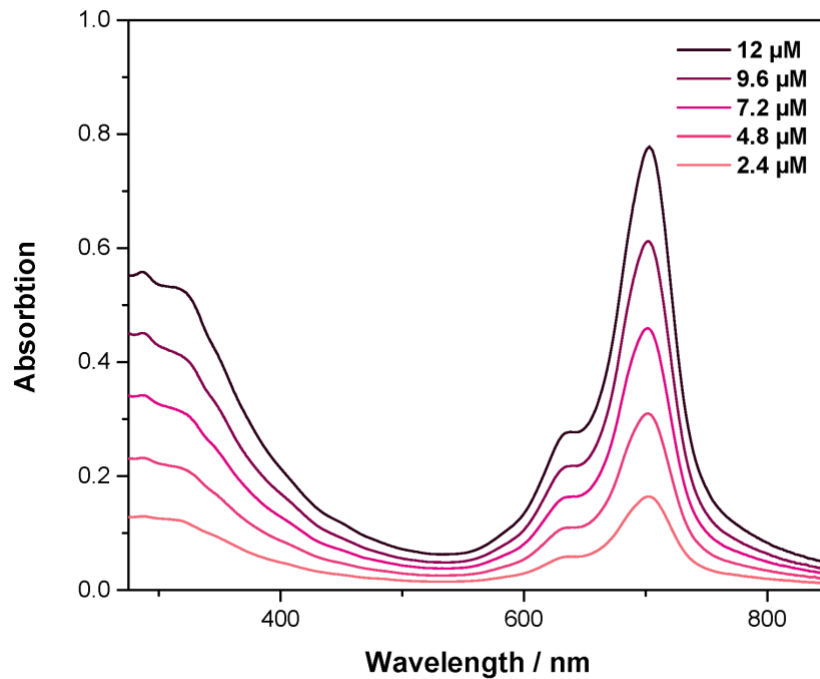

**Fig. S5.** Absorption spectra of **CoPc-1a** in DMF

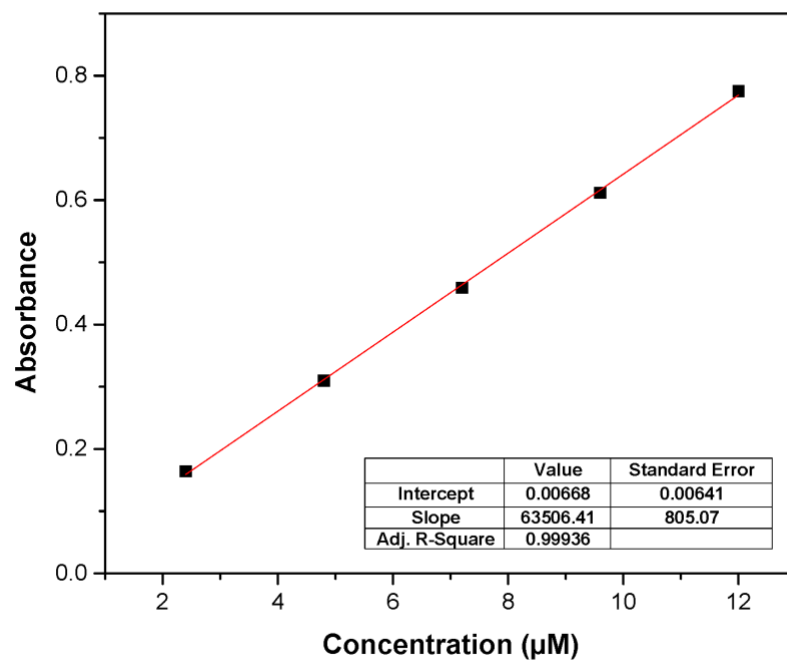

**Fig. S6.** Calibration curve for absorption at 702 nm of **CoPc-1a** in DMF

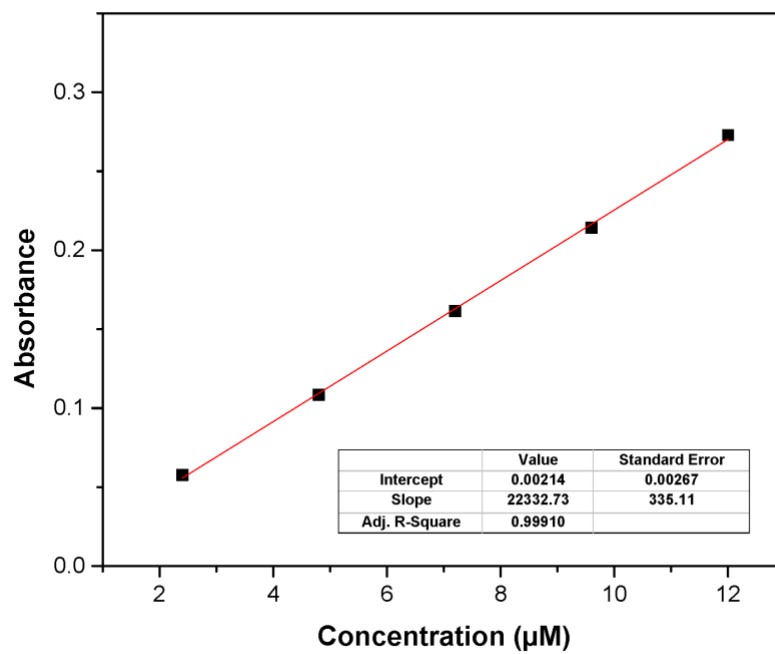

**Fig. S7.** Calibration curve for absorption at 633 nm of **CoPc-1a** in DMF

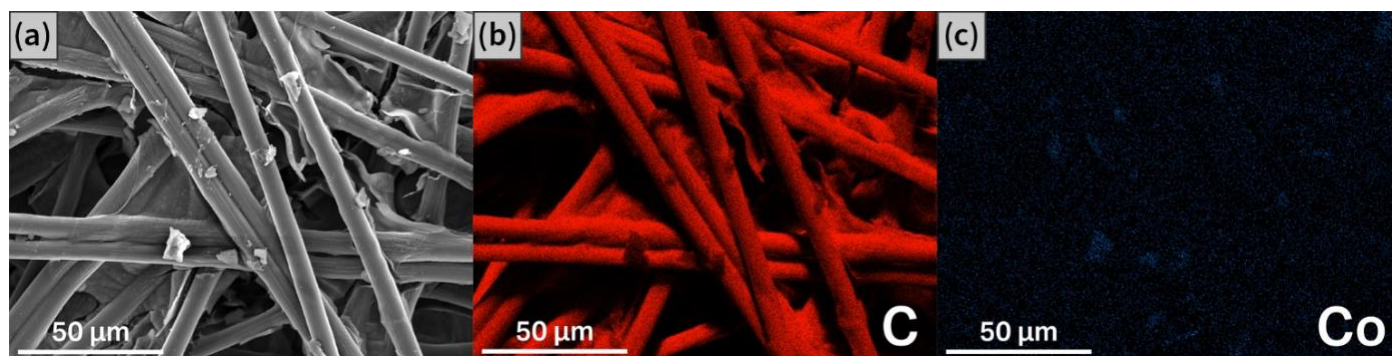

**Fig. S8.** SEM image of (a) **p(CoPc-1a)/CP**, and EDS mapping of (b) carbon and (c) cobalt atoms.

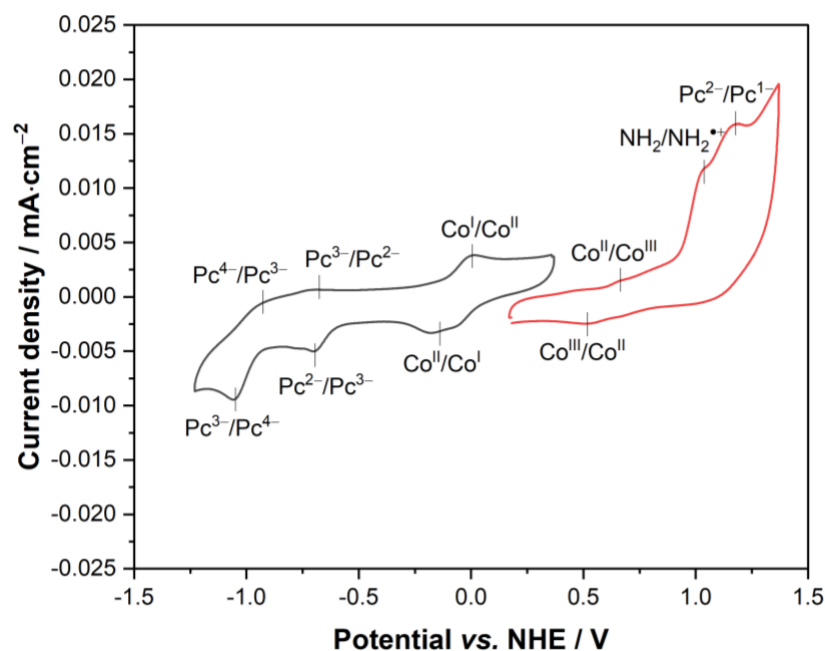

**Fig. S9.** Cyclic voltammograms of a **CoPc-1 $\alpha$**  solution in DMF

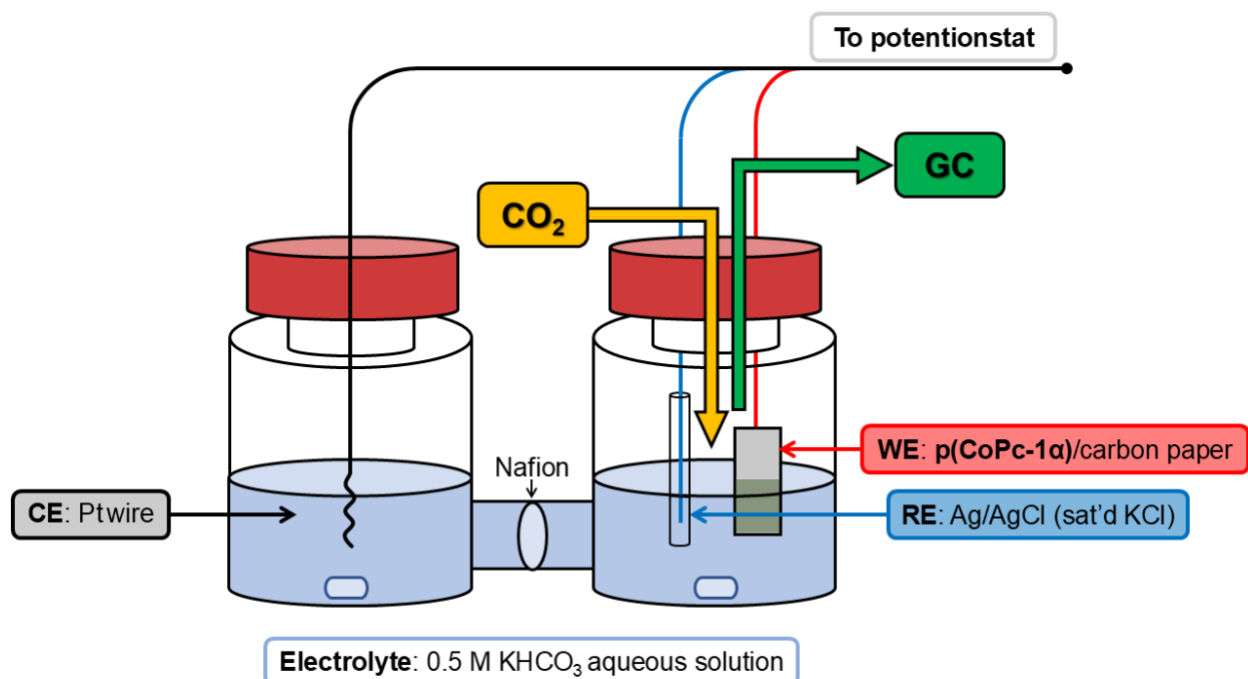

**Fig. S10.** An H-type electrochemical setup

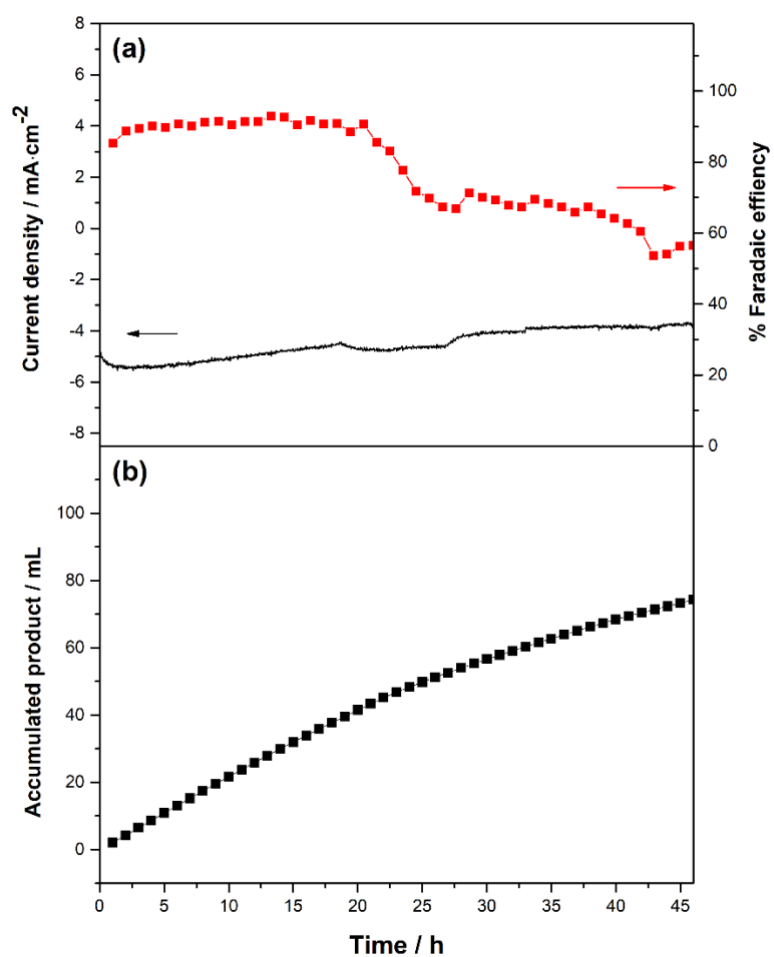

**Fig. S11.** (a) chronoamperometric responses with % FE<sub>CO</sub> and (b) accumulated amount of CO recorded over 45 h at -1.20 V vs. NHE for the **p(CoPc-1a)**-catalyzed CO<sub>2</sub>RR in the H-cell.

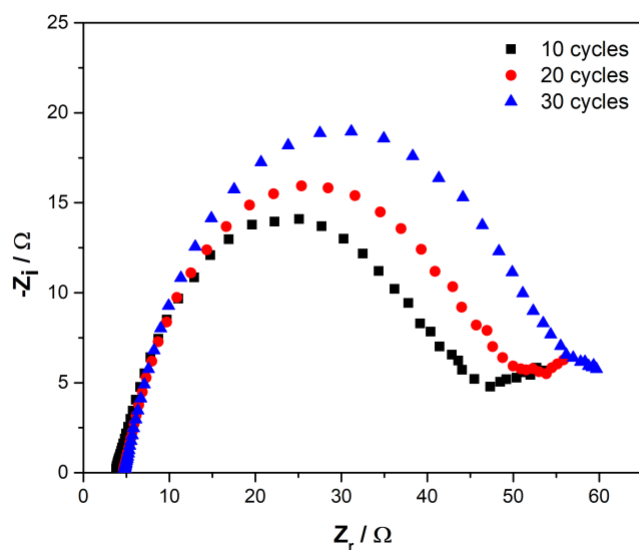

**Fig. S12.** Nyquist plots of faradaic impedance for the **p(CoPc-1 $\alpha$ )** films obtained from the electropolymerization of **CoPc-1 $\alpha$**  on the CP for 10 cycles (black squares), 20 cycles (red circles) and 30 cycles (blue triangles). The measurements were performed at  $-0.95$  V vs. NHE in a  $\text{CO}_2$ -saturated  $0.5$  M  $\text{KHCO}_3$  aqueous solution in the frequency range of  $0.1$  Hz to  $100000$  Hz.

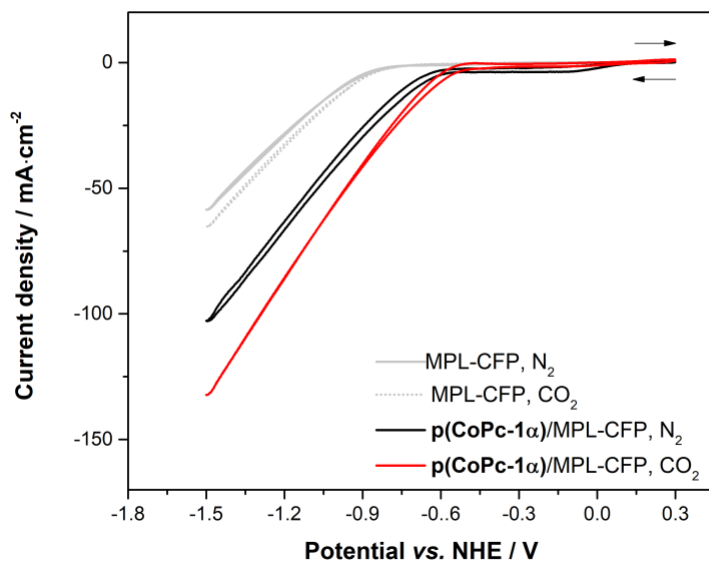

**Fig. S13.** Cyclic voltammograms of **p(CoPc-1 $\alpha$ )**/MPL-CFP under  $\text{N}_2$ - (black solid line) and  $\text{CO}_2$ -saturated (red solid line) conditions, compared with those of a bare MPL-CFP under the  $\text{N}_2$ - (grey solid line) and  $\text{CO}_2$ -saturated (grey dashed line) conditions recorded in a  $1.0$  M  $\text{KHCO}_3$  solution at a scan rate of  $50$   $\text{mV} \cdot \text{s}^{-1}$ .



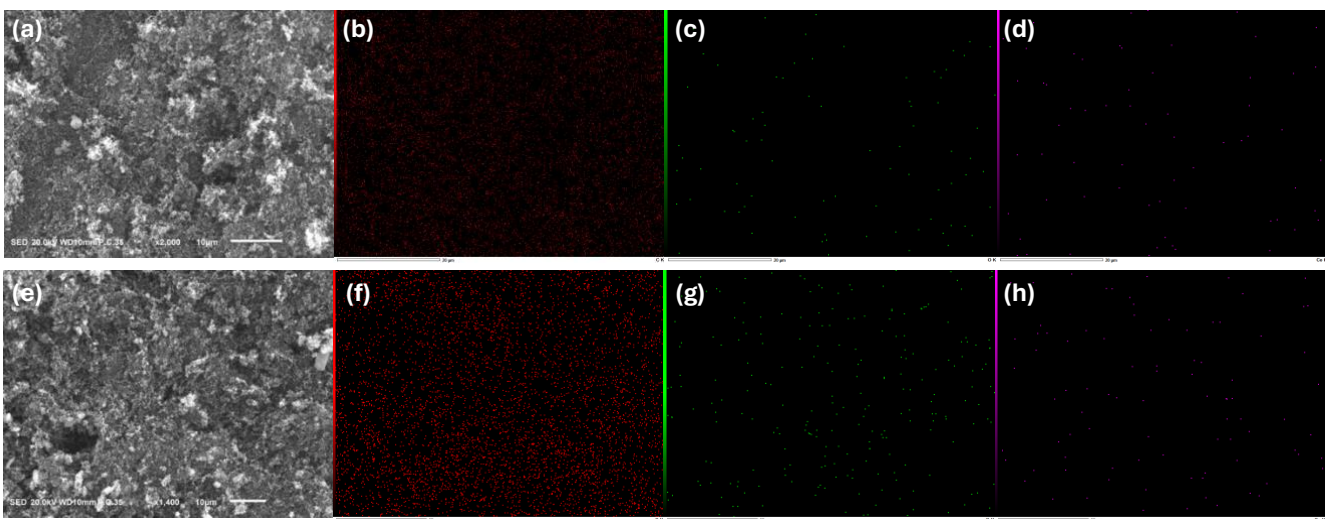

**Fig. S14.** (a) SEM image and EDS mapping of (b) carbon and (c) oxygen and (d) cobalt atoms of **p(CoPc-1 $\alpha$ )/MPL-CFP** before electrolysis, and (e) SEM image and EDS mapping of (f) carbon and (g) oxygen and (h) cobalt atoms of **p(CoPc-1 $\alpha$ )/MPL-CFP** after electrolysis.

### Modelling of CoPc-1 $\alpha$ and p(CoPc-1 $\alpha$ )

The optimized structures of **CoPc-1 $\alpha$**  and **p(CoPc-1 $\alpha$ )** are shown in **Fig. S13a-b**. Here, the polymer form has lattice size of 22.30 Å in both x- and y-direction. To model the adsorption on the graphene substrate, the orthorhombic graphene cell in (16,9,1) and (9,5,1) size of supercell were prepared for the substrate for **CoPc-1 $\alpha$**  and **p(CoPc-1 $\alpha$ )** (**Fig. S13c-d**). The lattice mismatch in polymer model was -4.5% and -0.7% in x and y direction of **p(CoPc-1 $\alpha$ )**, respectively.

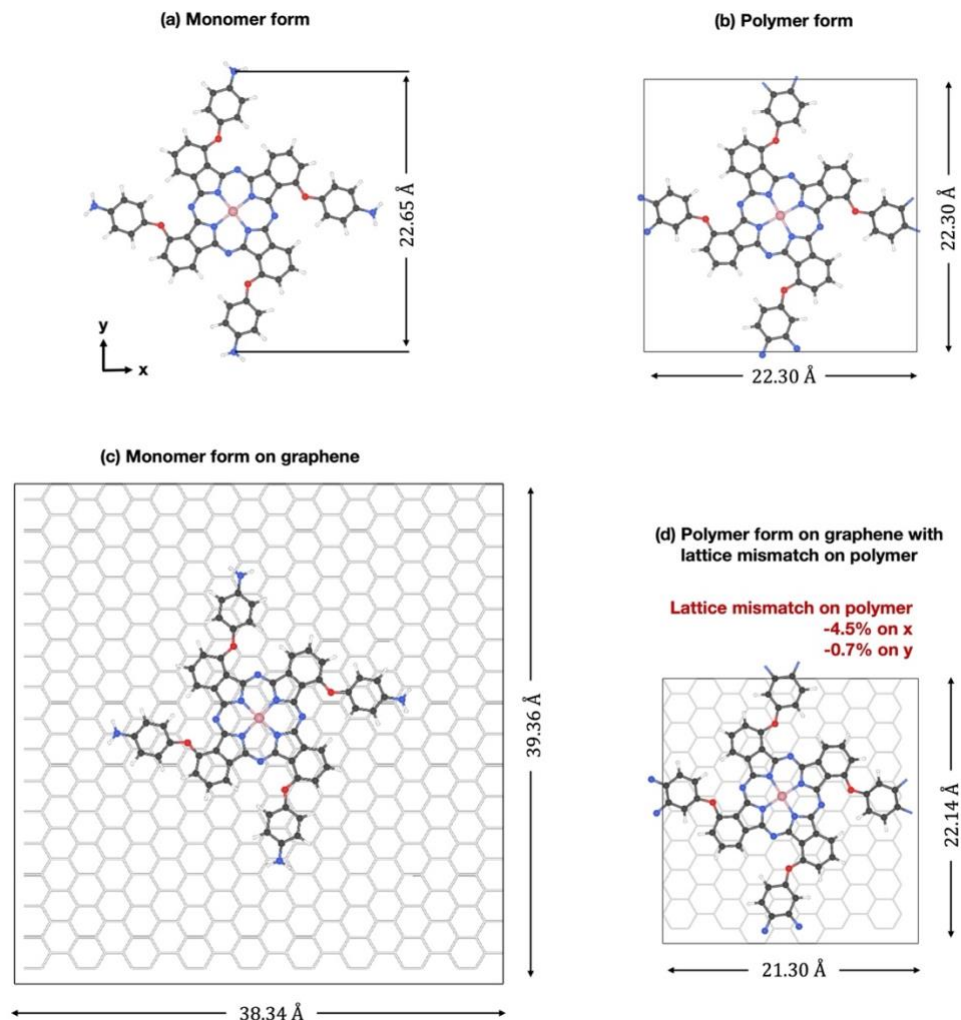

**Fig. S15.** The optimized structure of **CoPc-1** (a) and **p(CoPc-1 $\alpha$ )** (b). The simulation box for **CoPc-1** (c) and **p(CoPc-1 $\alpha$ )** (d) stacked on the graphene substrate.

### Modelling of deposition of CoPc-1 $\alpha$ on the substrate

The first layer deposition of the monolayer of **CoPc-1 $\alpha$**  on the graphene substrate was investigated. As shown in **Fig. S16**, the stacking configurations where the Co center is located on atop (T), bridge (B) and hollow (H) site of  $sp^2$ -C of graphene were investigated. The orientation angle ( $\theta$ ) of each stacking pattern was compared at  $\theta = 0^\circ, 15^\circ, 30^\circ, 45^\circ, 60^\circ$  and  $75^\circ$ . The most stable configuration was found to be the hollow site at  $\theta = 75^\circ$  (denoted as H75) with adsorption energy of 0.39 eV. Therefore, the subsequent investigation will be conducted using this stacking order.

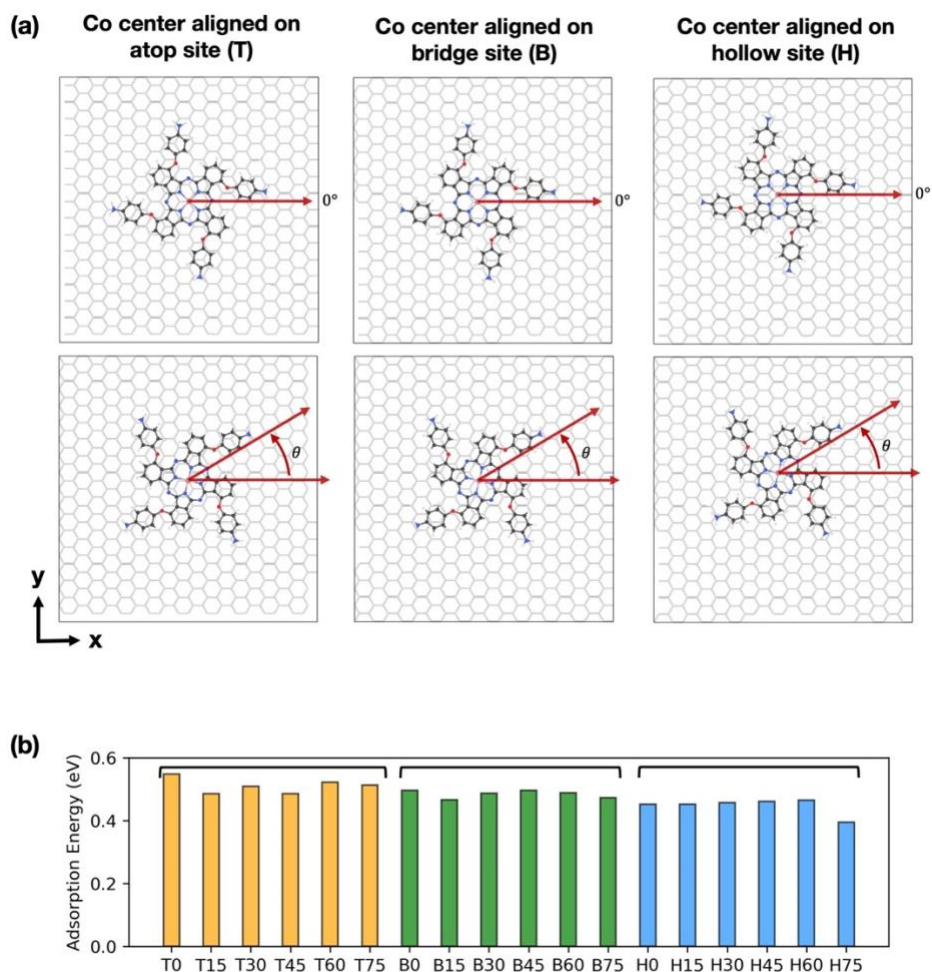

**Fig. S16.** (a) Stacking configuration of **CoPc-1α** on the graphene substrate where a Co center aligned on atop, bridge and hollow sites of  $sp^2$ -C of graphene. The orientation  $\theta$  of each stacking pattern was probed by rotating each configuration by 0°, 15°, 30°, 45°, 60° and 75° (b) Adsorption energy of each stacking pattern for first layer deposition.

To discuss charge transfer between neighboring **CoPc-1α** layers, we deposited the second layer on the first layer (H75). The stacking order of the second layer was considered as shown in **Fig. S17**. The charge density change due to the stacking will be calculated for all possibilities to provide the possible range of electron accumulation and electron depletion.

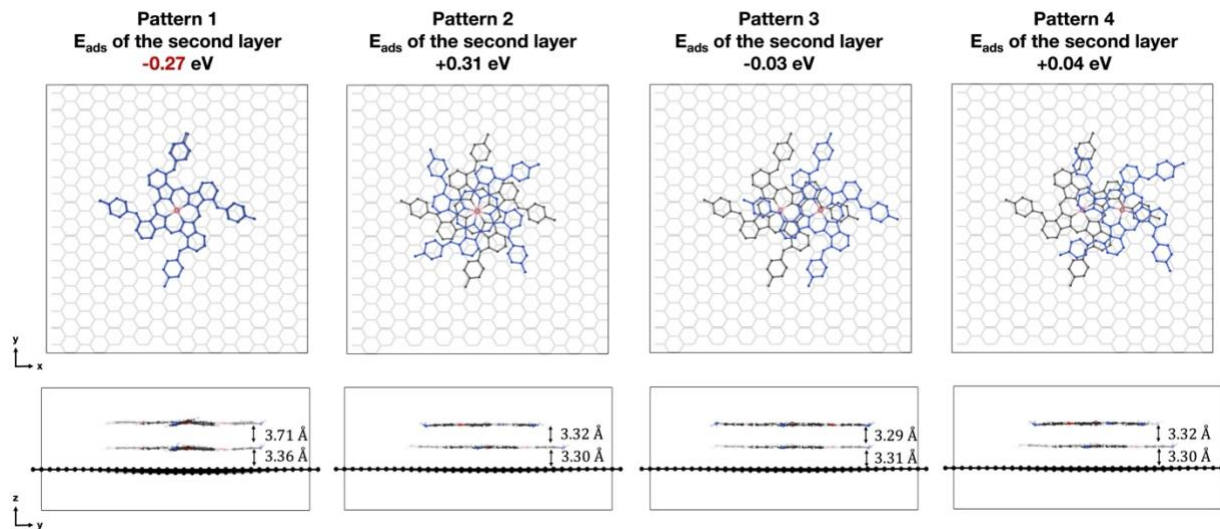

**Fig. S17.** Stacking configuration of **CoPc-1α** at the second layer (blue) on the graphene substrate where the first layer (black) aligned on atop site with orientation angle of 75°. The deposition of second layer was considered in 4 different possibilities.

### Modelling of deposition of **p(CoPc-1α)** on the substrate

The first layer deposition of **p(CoPc-1α)** on the graphene substrate was investigated. As seen in the monomer case, the stacking configurations where the Co center is located on atop (T), bridge (B) and hollow (H) site of  $sp^2$ -C of graphene were investigated (**Fig. S18**). Due to the limitation of periodic constraint of the model, the orientation dependence was ignored. Overall, the binding energy between **p(CoPc-1α)** and graphene was confirmed to be positive, showing **p(CoPc-1α)** weakly bound on the substrate.

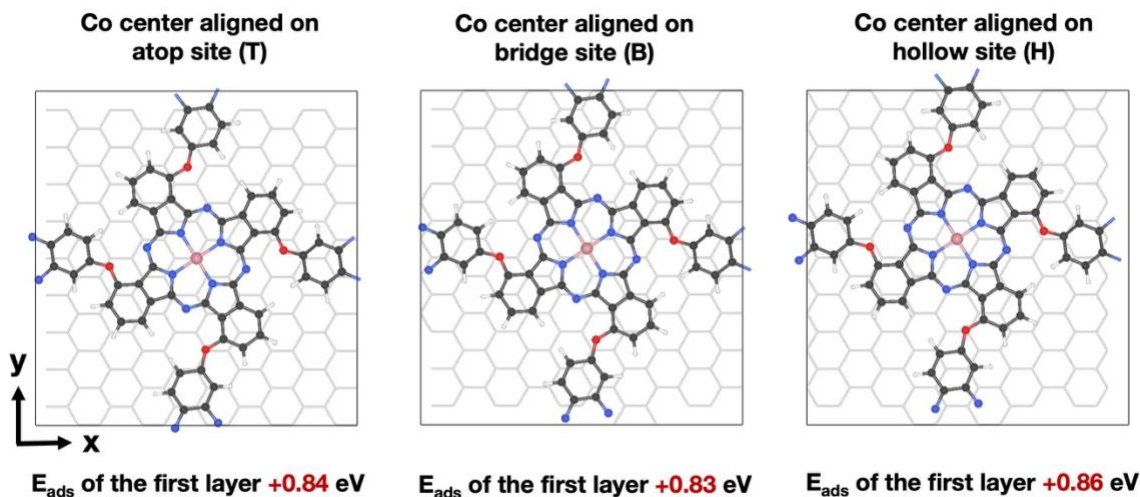

**Fig. S18.** Stacking configuration of **p(CoPc-1α)** on the graphene substrate where the Co center aligned on atop, bridge and hollow site of  $sp^2$ -C of graphene. Due to the limitation of periodic constraint in the model, the orientation dependence was ignored.

To discuss charge transfer between neighboring **p(CoPc-1α)** layers, we deposited the second layer on the first one. The stacking order of the second layer was considered in 3 possibilities as



shown in **Fig. S19**. Although the most energetically favorable configuration was found to be pattern 3 with positive adsorption energy of 0.21 eV, the charge density change due to the stacking will be calculated for all possibilities to provide the possible range of electron accumulation and electron depletion.

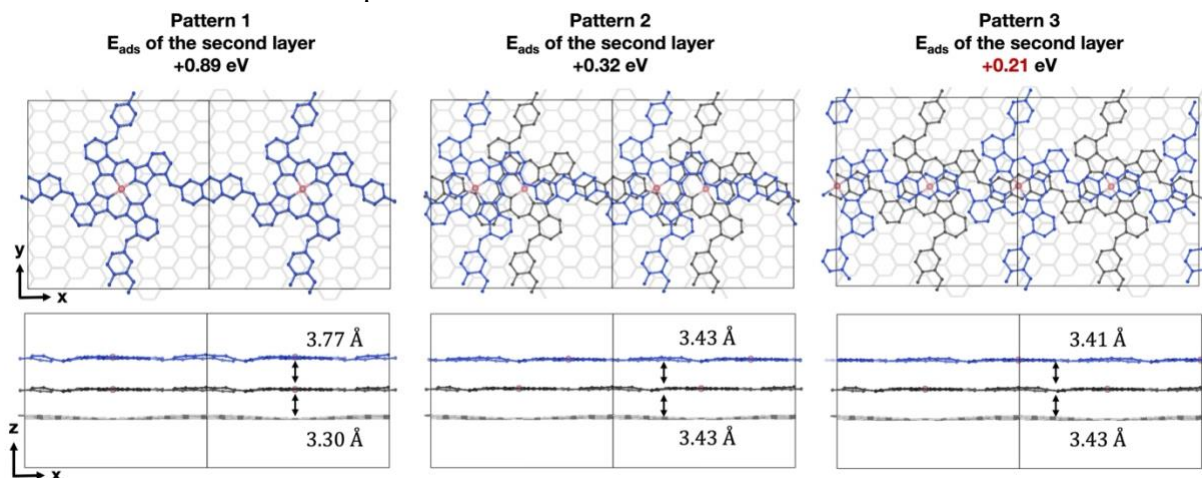

**Fig. S19.** Stacking configuration of **p(CoPc-1 $\alpha$ )** at the second layer (blue) on the graphene substrate where the first layer (black) aligned on bridge site. The deposition of the second layer was considered in 3 different possibilities.

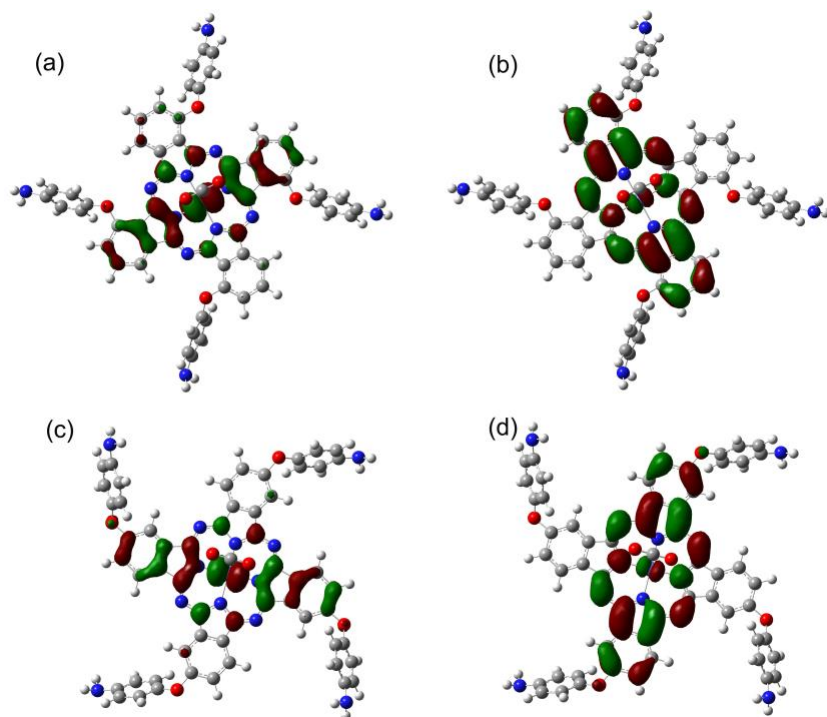

**Fig. S20.** (a) HOMO, (b) LUMO orbitals of  $\text{CO}_2$  adsorbed on the **CoPc-1 $\alpha$**  molecule and (c) HOMO, (d) LUMO of  $\text{CO}_2$  adsorbed on the **CoPc-1 $\beta$**  molecule.

**Table S1.** Assignment of ATR-FTIR spectra of **CoPc-2a**, **CoPc-1a** and **p(CoPc-1a)/Au-glass**

| Wavenumber / $\text{cm}^{-1}$ |         |            | Assignment                                                                             | Reference  |
|-------------------------------|---------|------------|----------------------------------------------------------------------------------------|------------|
| CoPc-2a                       | CoPc-1a | p(CoPc-1a) |                                                                                        |            |
| 738                           | 740     |            | $\delta_{\text{C-H}}$ (out-of-plane)                                                   | [43]       |
|                               |         | 752        | out-of-plane vibrations of C-H groups in phenazines                                    | [51]       |
|                               |         | 812        | skeletal deformations of phenazine ring system                                         | [51]       |
| 835                           | 836     | 854        | $\text{C-H}_{\text{Ar-O-Ar}}$ rocking                                                  | [44]       |
| 976                           | 976     | 983        | Benzene totally symmetric vibration                                                    | [43]       |
|                               |         | 983        | C-H in-plane deformation bands                                                         | [51]       |
|                               | 1084    | 1090       | C-O-C stretching and $\delta_{\text{C-H}}$ (in-plane)                                  | [43,45,46] |
|                               |         | 1090       | C-H in-plane deformation bands                                                         | [51]       |
| 1107                          | 1127    | 1135       | Isoindole totally symmetric vibration                                                  | [43]       |
|                               |         | 1135       | C-H in-plane deformation bands                                                         | [51]       |
|                               |         | 1204       | C-H in-plane deformation bands                                                         | [51]       |
| 1236                          | 1237    | 1251       | $\text{C}_{\text{aromatic}}\text{-O-C}$ stretching                                     | [45,47]    |
| 1326                          | 1325    | 1331       | C-C stretching in isoindole and $\nu$ (pyrrole)                                        | [43,48]    |
|                               | 1408    | 1410       | C-C stretching in isoindole, and vibrations of pyrrole fragment and nitrogen mesoatoms | [43,48]    |
| 1491                          | 1500    | 1507       | $\nu$ ( $\text{-N=}$ )                                                                 | [43]       |
| 1586                          | 1589    | 1589       | $\nu$ ( $\text{C=C}$ )                                                                 | [43]       |
|                               |         | 2943       | $\nu$ ( $\text{C-H}$ )                                                                 | [43]       |
|                               | 3210    |            | N-H stretching of primary amino group                                                  | [49]       |
|                               | 3324    |            | N-H stretching of primary amino group                                                  | [49]       |
|                               |         | 3376       | N-H stretching of secondary amino group                                                | [50]       |

**Table S2.** Assignment of Raman spectra of **CoPc-1a/CP** and **p(CoPc-1a)/CP**.

| Raman shift/ $\text{cm}^{-1}$ |            | Assignment                                                                                                                                                                                                               | Reference |
|-------------------------------|------------|--------------------------------------------------------------------------------------------------------------------------------------------------------------------------------------------------------------------------|-----------|
| CoPc-1a                       | p(CoPc-1a) |                                                                                                                                                                                                                          |           |
| 754                           | 754        | Co-N stretching coupled with pyrrole expanding                                                                                                                                                                           | [52]      |
| 1083                          | 1083       | C-H in-plane bending                                                                                                                                                                                                     | [53]      |
| 1278                          | 1278       | C-H in-plane bending                                                                                                                                                                                                     | [53]      |
| 1340                          | 1340       | Co-N stretching coupled with C-H in-plane bending, and isoindole stretching                                                                                                                                              | [52]      |
| 1349                          | 1349       | $\text{C}_{\beta}\text{-C}_{\beta}$ , $\text{C}_{\alpha}\text{-C}_{\beta}\text{-C}_{\beta}$ , $\text{C}_{\gamma}\text{-C}_{\delta}$ , and $\text{C}_{\beta}\text{-C}_{\gamma}$ stretching vibration of the pyrrole group | [54]      |
| 1426                          | 1426       | C- $\text{N}_m$ -C stretching, pyrrole expanding and C-H in-plane bending                                                                                                                                                | [55]      |
| 1462                          | 1462       | C-H in-plane bending and $\text{C}_{\beta}\text{-C}_{\beta}$ stretching                                                                                                                                                  | [55]      |
| 1539                          | 1539       | C- $\text{N}_m$ -C bridges stretching and pyrrole expanding coupled with C-H vibrations                                                                                                                                  | [52]      |

**Table S3.** Co<sup>II</sup> content on substrates determined by ICP-OES

| Substrate types | Co <sup>II</sup> content on substrates (μmol·cm <sup>-2</sup> ) |
|-----------------|-----------------------------------------------------------------|
| Carbon paper    | 0.052                                                           |
| MPL-CFP         | 0.061                                                           |

**Calculations of  $FE_{CO \text{ or } H_2}$ , TON and TOF**

$$FE_{CO \text{ or } H_2} = \frac{Z \times n \times F}{i_{total}} \times 100\%$$

$$Turnover \text{ number (TON)} = \frac{\text{mole of products}}{\text{mole of catalysts}}$$

$$Turnover \text{ frequency (TOF)} = \frac{TON}{\text{time (s)}}$$

*Z* number of electrons required to obtain product

*n* number of moles of the product

*R* gas constant, 8.314 J K<sup>-1</sup> mol<sup>-1</sup>

*T* temperature, 298.15 K

*F* Faraday's constant, 96485 C mol<sup>-1</sup>

*P* pressure, 101325 Pa

**Table S4.** Comparison of catalytic performance of **p(CoPc-1a)**/CFP with selected reported CoPc-based catalysts for ECO<sub>2</sub>R in the aqueous media.

| Catalyst             | Electrolyte             | Cell type | Potential /<br>V vs. NHE <sup>a</sup> | <i>J</i> /<br>mA·cm <sup>-2</sup> | FE <sub>CO</sub> /<br>% | TOF <sub>CO</sub> /<br>s <sup>-1</sup> | Stability /<br>h  | Ref.      |
|----------------------|-------------------------|-----------|---------------------------------------|-----------------------------------|-------------------------|----------------------------------------|-------------------|-----------|
| <b>p(CoPc-1a)</b>    | 0.5 M KHCO <sub>3</sub> | H-cell    | -1.15                                 | 3.8                               | 97                      | 0.37                                   | 45                | This work |
|                      | 1.0 M KHCO <sub>3</sub> | Flow cell | -1.54                                 | 151                               | 98                      | 13                                     | 42                |           |
| <b>p(CoPc-1β)</b>    | 0.5 M KHCO <sub>3</sub> | H-cell    | -1.19                                 | 5.9                               | 94                      | 1.1                                    | 120               | [25]      |
| <b>p-CoTAPc</b>      | 1 M KHCO <sub>3</sub>   | Flow cell | -1.60 <sup>a</sup>                    | 153 ±10                           | 93 ±9                   | ~140                                   | 41                | [24]      |
| <b>p(CoPc-1)</b>     | 0.5 M KHCO <sub>3</sub> | H-cell    | -1.09                                 | ~2                                | 94                      | 0.29                                   | 24                | [23]      |
| <b>CoPc-PI-COF-1</b> | 0.5 M KHCO <sub>3</sub> | H-cell    | -1.13 <sup>a</sup>                    | 9.4                               | 93                      | 2.2                                    | 40                | [60]      |
|                      | 1.0 M KOH               | Flow cell | -0.93 <sup>a</sup>                    | 44                                | 95                      | n.a. <sup>b</sup>                      | n.a. <sup>b</sup> |           |
| <b>CoPc-PI-COF-2</b> | 0.5 M KHCO <sub>3</sub> | H-cell    | -1.13 <sup>a</sup>                    | 6.2                               | 95                      | 1.9                                    | n.a. <sup>b</sup> |           |
| <b>CoPc-PI-COF-3</b> | 0.5 M KHCO <sub>3</sub> | H-cell    | -1.23 <sup>a</sup>                    | ~31.7                             | 96                      | 0.6                                    | 20                | [61]      |

<sup>a</sup> Values were estimated from the reported data in the RHE scale by using equation  $E_{RHE} = E_{NHE} + 0.059pH$

<sup>b</sup> Data was not available.
